# Supplementary material
Source: Springer Nature journal article supplement (https://www.springermedizin.de/resource/supplementary/13075_2013_4086_MOESM6_ESM.pdf/9695992)

**Adiponectin**  
**AUC=0.56**

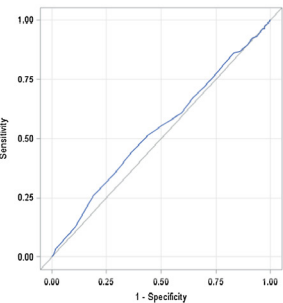

**Leptin**  
**AUC=0.55**

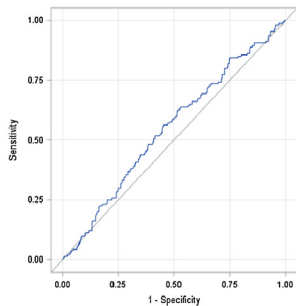

**Visfatin**  
**AUC=0.54**

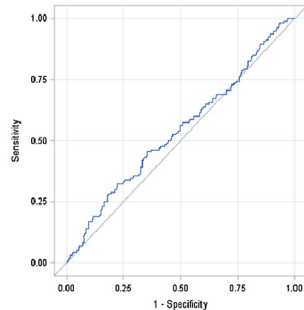

**DAS28**  
**AUC=0.52**

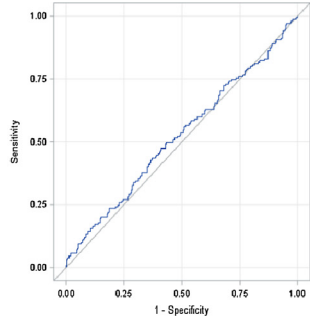

**Swollen joints count**  
**AUC=0.54**

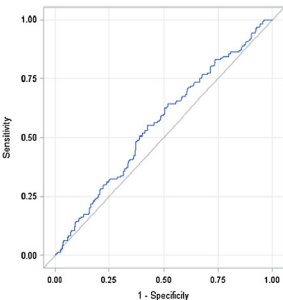

**CRP level**  
**AUC=0.53**

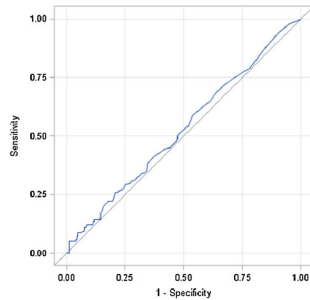

**RF level**  
**AUC=0.65**

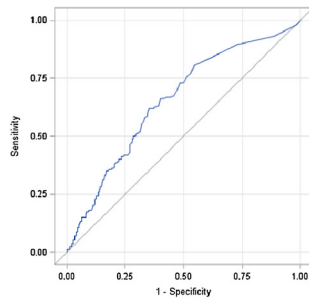

**Anti-CCP level**  
**AUC=0.70**

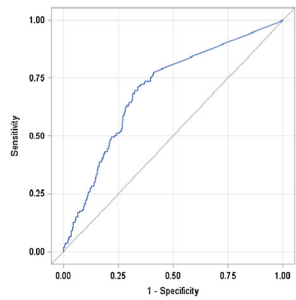

Supplement: MOESM6 [file 9695992]
